# Supplementary material for: Effects of Wet-Pressing and Cross-Linking on the Tensile Properties of Carbon Nanotube Fibers
Source: Materials (Basel). 2018 Nov 2;11(11):2170. doi: 10.3390/ma11112170 (PMC6266003; doi:10.3390/ma11112170)
Supplement: Supplementary file 1 [file materials-11-02170-s001.zip]

Archive with 4 entries (4 files):
- GIF1.contact angle_water.gif
- GIF2.contact angle_acetone.gif
- GIF3.contact angle_AAD.gif
- materials-supplementary.pdf
